# Supplementary material
Source: MDPI journal article supplement (doi:10.3390/horticulturae12050627)
Supplement: s1 [file horticulturae-4311594-supplementary.pdf › horticulturae-4311594-supplementary.pdf]

## Supplementary Methods

### 1. Seed germination assay for safety validation of strain L11

The strain L11 was cultured in LB broth at 28 °C with shaking until the optical density at 600 nm (OD<sub>600</sub>) reached 1.0. And then Chinese cabbage (*Brassica rapa* subsp. *chinensis*) seeds were surface-sterilized with 75% ethanol for 30 s, followed by 0.5% sodium hypochlorite (NaClO) for 5 min, and then rinsed thoroughly with sterile distilled water. The sterilized seeds were soaked in the L11 suspension (experimental group) or sterile distilled water (control group) for 1 h at room temperature. After soaking, the seeds were placed on sterile filter paper moistened with sterile distilled water in sterile Petri dishes. Each treatment contained 20 seeds per dish. The dishes were incubated at 28 °C in darkness. Seed germination (radicle emergence) was recorded daily for 3 days, and the germination phenotypes were compared between the L11 treatment and the control.

### Supplementary Figures and Tables

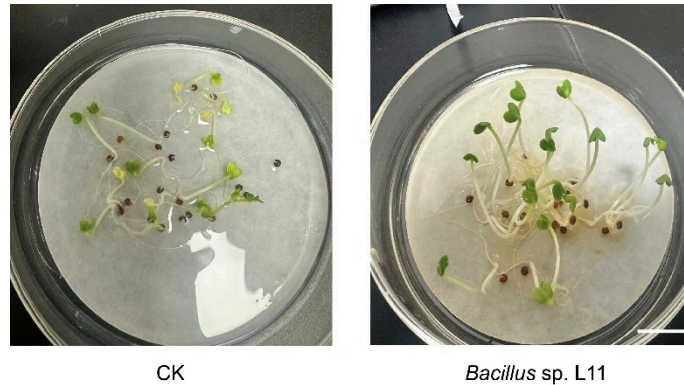

Figure S1. Seed germination phenotypes of the L11 treatment and control groups.

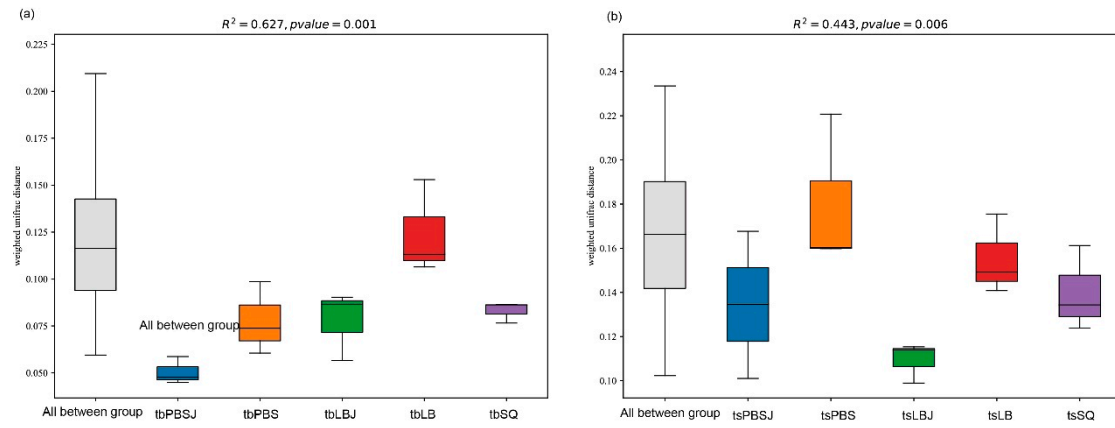

**Figure S2. Permutational multivariate analysis of variance (PERMANOVA) based on weighted unifrac distance.** (a) *S. lycopersicum* seedlings cultivated in peat-based artificial substrate. (b) *S. lycopersicum* seedlings cultivated in soil. tb: peat-based artificial substrate cultivation; ts: soil cultivation.

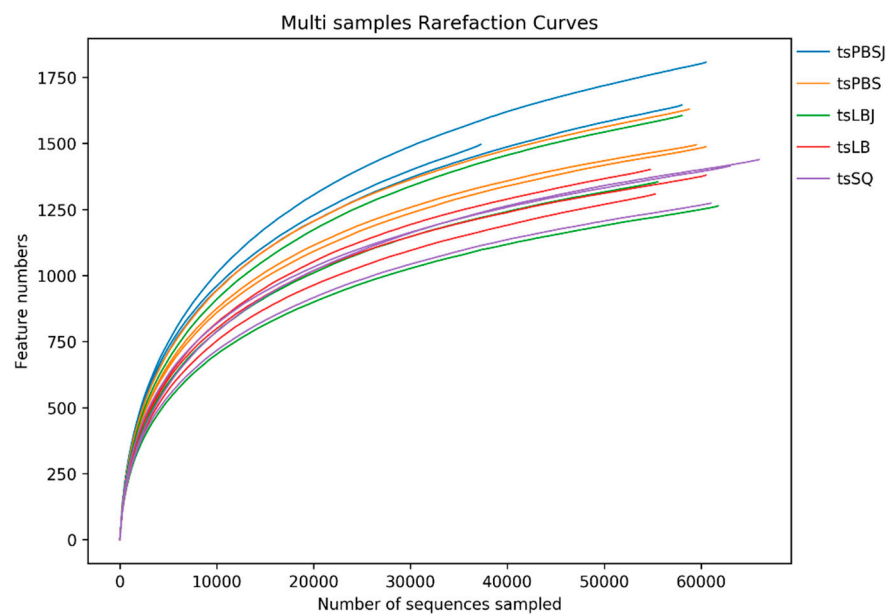

**Figure S3. Rarefaction Curves of bacterial community in soil cultivation system.**

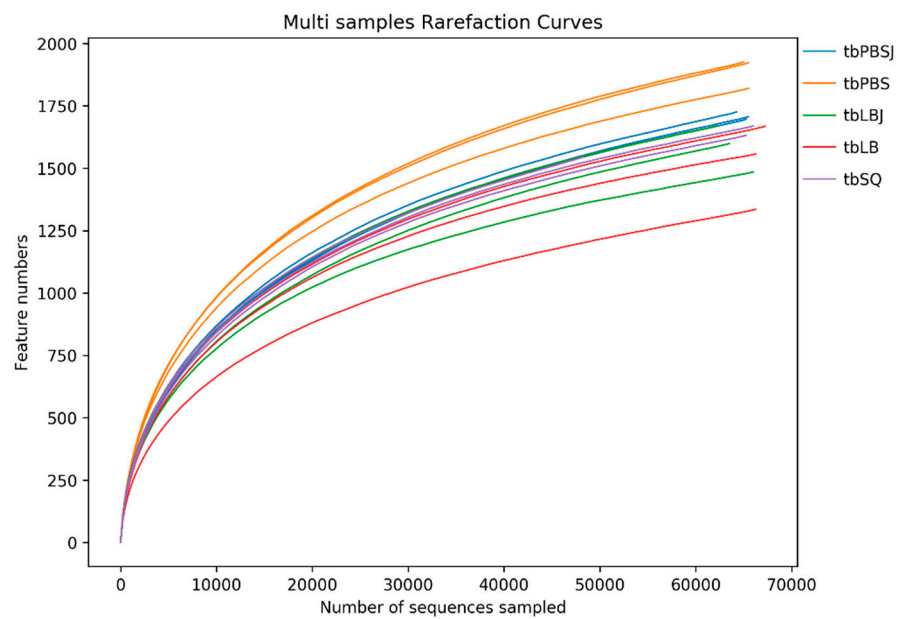

**Figure S4. Rarefaction Curves of bacterial community in artificial peat-based substrates.**

Table S1 Sample Sequencing Data

| Sample ID | Raw Reads | Clean Reads | Effective Reads | AvgLen (bp) | GC (%) | Q20 (%) | Q30 (%) | Effective (%) |
|-----------|-----------|-------------|-----------------|-------------|--------|---------|---------|---------------|
| tbLB1     | 80083     | 75494       | 70890           | 417         | 55.01  | 99.34   | 96.84   | 88.52         |
| tbLB2     | 78889     | 74119       | 69073           | 419         | 54.17  | 99.33   | 96.79   | 87.56         |
| tbLB3     | 80072     | 75017       | 70214           | 417         | 54.84  | 99.28   | 96.61   | 87.69         |
| tbLBJ1    | 78934     | 73175       | 69078           | 416         | 54.33  | 99.29   | 96.65   | 87.51         |
| tbLBJ2    | 80191     | 75544       | 67807           | 416         | 54.69  | 99.3    | 96.67   | 84.56         |
| tbLBJ3    | 80299     | 74352       | 67946           | 417         | 54.22  | 99.31   | 96.78   | 84.62         |
| tbPBS1    | 79971     | 74273       | 69677           | 416         | 54.85  | 99.29   | 96.67   | 87.13         |
| tbPBS2    | 79957     | 74863       | 69721           | 416         | 54.92  | 99.31   | 96.73   | 87.2          |
| tbPBS3    | 79998     | 74488       | 69837           | 417         | 55.12  | 99.33   | 96.8    | 87.3          |
| tbPBSJ1   | 79896     | 75472       | 69829           | 417         | 54.9   | 99.29   | 96.68   | 87.4          |
| tbPBSJ2   | 76619     | 71822       | 67916           | 416         | 54.84  | 99.35   | 96.92   | 88.64         |
| tbPBSJ3   | 80012     | 74192       | 69571           | 416         | 54.66  | 99.28   | 96.63   | 86.95         |
| tbSQ1     | 79998     | 74704       | 69885           | 416         | 54.64  | 99.32   | 96.79   | 87.36         |
| tbSQ2     | 57151     | 52977       | 50446           | 416         | 54.7   | 99.36   | 96.94   | 88.27         |
| tbSQ3     | 80056     | 75197       | 69590           | 416         | 54.51  | 99.33   | 96.8    | 86.93         |
| tsLB1     | 66927     | 60198       | 57296           | 422         | 53.14  | 99.09   | 96.05   | 85.61         |
| tsLB2     | 76970     | 68211       | 63296           | 420         | 53.48  | 99.07   | 96.03   | 82.23         |
| tsLB3     | 68368     | 62270       | 57603           | 419         | 53.25  | 99.12   | 96.2    | 84.25         |
| tsLBJ1    | 80032     | 71605       | 62756           | 419         | 53.7   | 99.09   | 96.09   | 78.41         |
| tsLBJ2    | 79901     | 72803       | 65277           | 420         | 53.44  | 99.11   | 96.16   | 81.7          |
| tsLBJ3    | 70506     | 62599       | 58216           | 420         | 53.39  | 99.08   | 96.01   | 82.57         |
| tsPBS1    | 79996     | 71779       | 64511           | 419         | 54.43  | 99.23   | 96.55   | 80.64         |
| tsPBS2    | 79981     | 74454       | 64892           | 419         | 53.84  | 99.28   | 96.66   | 81.13         |
| tsPBS3    | 79972     | 73770       | 64971           | 421         | 53.19  | 99.24   | 96.48   | 81.24         |
| tsPBSJ1   | 80219     | 74305       | 65451           | 419         | 53.82  | 99.21   | 96.42   | 81.59         |
| tsPBSJ2   | 79900     | 72918       | 63369           | 419         | 53.78  | 99.22   | 96.44   | 79.31         |
| tsPBSJ3   | 47336     | 43729       | 39839           | 419         | 53.1   | 99.18   | 96.29   | 84.16         |
| tsSQ1     | 80050     | 72355       | 66255           | 419         | 53.3   | 99.1    | 96.13   | 82.77         |
| tsSQ2     | 75392     | 68627       | 63639           | 420         | 53.76  | 99.15   | 96.23   | 84.41         |
| tsSQ3     | 79961     | 73233       | 68718           | 421         | 53.61  | 99.1    | 96.12   | 85.94         |
